# Supplementary material
Source: Springer Nature journal article supplement (https://www.springermedizin.de/resource/supplementary/12888_2009_663_MOESM2_ESM.pdf/9478092)
Supplement: MOESM2 [file 9478092]

**Potentially eligible studies identified  
(n = 391) from**  
Medline (n = 219)  
SCI & SSCI (n = 80)  
PsycINFO (n = 42)  
CINAL (n = 34)  
Embase (n = 16)

**Studies excluded**  
Biochemical studies/genetics  
Studies involving children  
Disordered personalities due to organic  
causes  
Disorders of personality not  
categorised as PD by DSM or ICD  
e.g. PTSD, ADHD

**14 studies identified from search**  
1 study identified by citation tracking:  
Cross sectional studies (n = 7)  
Cohort studies (n = 5)  
Survey (n= 2)  
RCT (n = 1)
